# Supplementary material for: Synonymous Genes Explore Different Evolutionary Landscapes
Source: PLoS Genet. 2008 Nov 14;4(11):e1000256. doi: 10.1371/journal.pgen.1000256 (PMC2575237; doi:10.1371/journal.pgen.1000256)
Supplement: Table S2 — Properties of the mutant libraries. (0.03 MB DOC) [file pgen.1000256.s005.doc]

# Table S2: Properties of the mutant libraries

|  | **#** | **Size2** | **Mut. Rate3** |
| --- | --- | --- | --- |
|
| ***aacWT*1** | 1 | >106 | 0.5 |
| 2 | >106 | 1.3 |
| 3 | >106 | 3.1 |
| 4 | >106 | 5.2 |
| ***aacELP*1** | 1 | >106 | 1.3 |
| 2 | >106 | 0.9 |
| 3 | >106 | 2.5 |
| 4 | >106 | 3.2 |

1 Libraries were generated by error-prone PCR from each version of the gene *aac(6’)-Ib*.

2 Each pool contained approximately the same number of clones, as estimated on plates before selection.

3 The mean mutation rate is 2.5 mut./kb for *aacWT* and 2 mut./kb for *aacELP*
